# Supplementary material for: Reliability of recommended non-invasive chairside screening tests for diabetes-related peripheral neuropathy: a systematic review with meta-analyses
Source: PubMed Central journal article supplement — BMJ Open Diabetes Res Care. 2021 Dec 24;9(2):e002528. doi: 10.1136/bmjdrc-2021-002528 (PMC8710873; doi:10.1136/bmjdrc-2021-002528), 2021-12-24
Supplement: bmjdrc-2021-002528supp001.pdf [file bmjdrc-2021-002528supp001.pdf]

Supplementary Table 1: Quality appraisal of reliability studies (QAREL checklist)  
Y, yes; N, no; U, unable to determine; N/A, not applicable

| ITEM                                                                                                                                            | Arshad et al. (2016) | Bax et al. (1996) | Bril et al. (1997) | Chew et al. (2020) | Domínguez-Muñoz (2020) | Gentile et al. (1995) | Guy et al. (1985) | Hirschfeld et al. (2015) | Lanting et al. (2020) | Lasca et al. (2016) | Louraki et al. (2013) | Maser et al. (1989) | Paisley et al. (2001) | Smieja et al. (1999) | Tentolouris et al. (2021) | Van Deursen et al. (2001) | Young et al. (1992) |
|-------------------------------------------------------------------------------------------------------------------------------------------------|----------------------|-------------------|--------------------|--------------------|------------------------|-----------------------|-------------------|--------------------------|-----------------------|---------------------|-----------------------|---------------------|-----------------------|----------------------|---------------------------|---------------------------|---------------------|
| 1. Was the test evaluated in a sample of subjects who were representative of those who the authors intended the results to be applied?          | Y                    | Y                 | Y                  | Y                  | Y                      | Y                     | Y                 | Y                        | Y                     | Y                   | Y                     | Y                   | Y                     | Y                    | Y                         | Y                         | Y                   |
| 2. Was the test performed by raters who were representative of those to whom the authors intended the results to be applied?                    | Y                    | Y                 | U                  | U                  | U                      | N/A                   | N/A               | Y                        | Y                     | Y                   | N/A                   | Y                   | N/A                   | Y                    | Y                         | U                         | N/A                 |
| 3. Were raters blinded to the findings of other raters during the study?                                                                        | Y                    | Y                 | N/A                | Y                  | N/A                    | N/A                   | N/A               | Y                        | Y                     | N/A                 | N/A                   | Y                   | N/A                   | Y                    | Y                         | Y                         | N/A                 |
| 4. Were raters blinded to their own prior findings of the test under evaluation?                                                                | N/A                  | Y                 | N/A                | Y                  | U                      | N/A                   | N/A               | N/A                      | Y                     | N/A                 | N                     | N/A                 | N/A                   | N                    | N/A                       | N/A                       | N/A                 |
| 5. Were raters blinded to the results of the reference standard for the target disorder (or variable) being evaluated?                          | N/A                  | N/A               | N/A                | U                  | U                      | N/A                   | N/A               | N                        | N/A                   | N/A                 | U                     | N/A                 | U                     | N                    | U                         | N/A                       | U                   |
| 6. Were raters blinded to clinical information that was not intended to be provided as part of the testing procedure or study design?           | N/A                  | U                 | Y                  | U                  | U                      | N/A                   | N/A               | Y                        | Y                     | N/A                 | Y                     | N/A                 | Y                     | N                    | U                         | N                         | N/A                 |
| 7. Were raters blinded to additional cues that were not part of the test?                                                                       | N/A                  | U                 | N                  | N                  | N                      | N/A                   | N/A               | N/A                      | N                     | N/A                 | N/A                   | N/A                 | N/A                   | N/A                  | N                         | N/A                       | N                   |
| 8. Was the order of examination varied?                                                                                                         | Y                    | N/A               | U                  | U                  | Y                      | N/A                   | N/A               | Y                        | Y                     | N/A                 | N/A                   | N/A                 | N/A                   | N/A                  | U                         | N/A                       | N/A                 |
| 9. Was the time interval between repeated measurements compatible with the stability (or theoretical stability) of the variable being measured? | Y                    | Y                 | Y                  | Y                  | Y                      | Y                     | Y                 | Y                        | Y                     | Y                   | Y                     | Y                   | N                     | N                    | Y                         | Y                         | Y                   |
| 10. Was the test applied correctly and interpreted appropriately?                                                                               | Y                    | Y                 | Y                  | Y                  | Y                      | Y                     | Y                 | Y                        | Y                     | Y                   | Y                     | Y                   | Y                     | Y                    | Y                         | Y                         | Y                   |
| 11. Were appropriate statistical measures of agreement used?                                                                                    | Y                    | Y                 | Y                  | Y                  | Y                      | Y                     | Y                 | Y                        | Y                     | Y                   | Y                     | Y                   | Y                     | Y                    | Y                         | Y                         | Y                   |
